# Supplementary material
Source: Elsevier journal article supplement (https://www.sciencedirect.com/science/article/pii/S1695403320304367)
Supplement: mmc1 [file S1695403320304367:mmc1.pdf]

## Archivo suplementario 1. Cuestionario de conocimientos

|                  |                                                       |           |  |           |  |
|------------------|-------------------------------------------------------|-----------|--|-----------|--|
| Código           |                                                       |           |  |           |  |
| Nombre Apellidos |                                                       |           |  |           |  |
| Sexo             | H <input type="checkbox"/> M <input type="checkbox"/> | Peso (Kg) |  | Talla(cm) |  |

|         |  |       |  |
|---------|--|-------|--|
| Colegio |  | Curso |  |
|---------|--|-------|--|

|                                                                        |
|------------------------------------------------------------------------|
| TEST Pretest <input type="checkbox"/> Postest <input type="checkbox"/> |
|------------------------------------------------------------------------|

¿A qué número llamarías en caso de emergencia?

- a.- 112
- b.- 123
- c.- 000

2.- El masaje cardíaco se realiza en:

- a.- Pecho
- b.- Abdomen
- c.- Cuello

3.- En una situación de emergencia lo primero que haremos será:

- a.- Salir corriendo
- b.- Hacer masaje cardíaco
- c.- Proteger la zona, Alertar a los servicios de emergencia y Socorrer al paciente

4.- ¿Cómo comprobarías si un paciente está consciente?

- a.- Mirando si respira
- b.- Acercándome con cuidado a su cabeza y preguntando si está bien
- c.- Tomándole el pulso

5.- El corazón late a una velocidad de:

- a.- 80-100 latidos por minuto
- b.- 30 latidos por minuto
- c.- 200 latidos por minuto

Archivo suplementario 2. Rúbrica de secuencia SVB y Habilidades de RCP.

|                  |                                                       |           |  |           |  |
|------------------|-------------------------------------------------------|-----------|--|-----------|--|
| Código           |                                                       |           |  |           |  |
| Nombre Apellidos |                                                       |           |  |           |  |
| Sexo             | H <input type="checkbox"/> M <input type="checkbox"/> | Peso (Kg) |  | Talla(cm) |  |

|         |  |       |  |
|---------|--|-------|--|
| Colegio |  | Curso |  |
|---------|--|-------|--|

| TEST     |          |        |
|----------|----------|--------|
|          | Aciertos | Fallos |
| Pretest  |          |        |
| Posttest |          |        |

| CHECK LIST SVB |        |        |        |       |             |
|----------------|--------|--------|--------|-------|-------------|
|                | CÓDIGO | SI (1) | NO (0) | Orden | COMENTARIOS |

|              |    |                          |                          |  |                                                  |
|--------------|----|--------------------------|--------------------------|--|--------------------------------------------------|
| Proteger     | P1 | <input type="checkbox"/> | <input type="checkbox"/> |  |                                                  |
| Consciencia  | P2 | <input type="checkbox"/> | <input type="checkbox"/> |  |                                                  |
| Pedir ayuda  | P3 | <input type="checkbox"/> | <input type="checkbox"/> |  |                                                  |
| Abrir vía    | P4 | <input type="checkbox"/> | <input type="checkbox"/> |  |                                                  |
| Vos          | P5 | <input type="checkbox"/> | <input type="checkbox"/> |  |                                                  |
| Llamada SEM  | P6 | <input type="checkbox"/> | <input type="checkbox"/> |  |                                                  |
| Compresiones | P7 | <input type="checkbox"/> | <input type="checkbox"/> |  | Compresiones Guiadas SI <input type="checkbox"/> |
|              |    | Tiempo (Sg)              |                          |  |                                                  |

| SKILL REPORTE 2 MINUTO   |  |                                   |  |                                         |  |
|--------------------------|--|-----------------------------------|--|-----------------------------------------|--|
| 1. QCPR                  |  | 4. NTC (nº total de compresiones) |  | 8. PCRC % compresiones a ritmo correcto |  |
| 2. % compresión continua |  | 5. MP media profundidad           |  | 9. RM (ritmo medio)                     |  |
| 3. PM posición de manos  |  | 6. PDC % Descompresión correcta   |  | 10. Comp/descom Ratio                   |  |
|                          |  | 7. PPC % Profundidad correcta     |  |                                         |  |

**Archivo suplementario 3.** Porcentajes de realización de la secuencia de RCP en función del curso.

| <b>Variables</b>               | <b>3ºEP</b> | <b>5ºEP</b> | <b>1ºESO</b> | <b><i>p</i></b>  |
|--------------------------------|-------------|-------------|--------------|------------------|
| <b>Asegurar la escena</b>      | 57,1        | 85,5        | 78,2         | <b>&lt;0,001</b> |
| <b>Valorar respuesta</b>       | 66,1        | 86,0        | 85,4         | <b>&lt;0,001</b> |
| <b>Abrir vía aérea</b>         | 54,4        | 70,9        | 55,3         | <b>&lt;0,001</b> |
| <b>Maniobra ver-oír-sentir</b> | 89,0        | 83,8        | 86,9         | 0,344            |
| <b>Llamar al SEM</b>           | 82,6        | 91,8        | 77,9         | <b>&lt;0,001</b> |
| <b>Iniciar compresiones</b>    | 98,9        | 97,2        | 99,0         | 0,294            |

#### Archivo suplementario 4. Variables de calidad de compresiones en función del curso

| Variables                                        | 3ºEP (A)     | 5ºEP (B)     | 1ºESO (C)    | <i>p</i>         |
|--------------------------------------------------|--------------|--------------|--------------|------------------|
| <b>Calidad Global de la reanimación</b>          | 1,0 (4,6)    | 10,5 (16,7)  | 21,6 (26,2)  | <b>0,003</b>     |
| <b>Tiempo hasta inicio compresiones</b>          | 46,1 (17,0)  | 45,8 (17,5)  | 41,8 (14,9)  | <b>&lt;0,001</b> |
| <b>% Compresión continua</b>                     | 86,4 (23,6)  | 97,8 (6,5)   | 98,7 (7,2)   | <b>&lt;0,001</b> |
| <b>% Posición correcta de manos</b>              | 94,8 (18,2)  | 96,8 (15,9)  | 98 (12,7)    | <b>&lt;0,001</b> |
| <b>Media de profundidad</b>                      | 19,6 (5,1)   | 27,9 (7,6)   | 32,0 (9,7)   | <b>&lt;0,001</b> |
| <b>% compresiones con descompresión correcta</b> | 91,4 (16,3)  | 87,7 (18,3)  | 85,9(22,4)   | 0,143            |
| <b>% compresiones con profundidad correcta</b>   | 0,0(0,0)     | 1,9 (5,2)    | 6,7 (15,5)   | <b>&lt;0,001</b> |
| <b>% compresiones ritmo correcto</b>             | 30,4 (25,7)  | 34,1 (32,4)  | 41,8 (35,1)  | <b>0,025</b>     |
| <b>Ritmo medio</b>                               | 107,8 (23,0) | 113,7 (20,8) | 112,5 (19,7) | <b>0,029</b>     |

Los datos se expresan como media y desviación típica
